# Supplementary material for: Changes in Healthcare Spending After Diagnosis of Comorbidities Among Endometriosis Patients: A Difference-in-Differences Analysis
Source: Springer Nature journal article supplement (doi:10.1007/s12325-017-0630-8), 2017-11-01
Supplement: MOESM1 [file 15190106]

Online Supplementary Material

Table S.1. Exclusion path for case patients with 365-day follow-up by comorbidity

| Comorbidity                       | Total          | Negative Cost (1) | Inadequate Coverage (2) | No Controls (3) | Main Sample (4) | Alt Sample (5) |
|-----------------------------------|----------------|-------------------|-------------------------|-----------------|-----------------|----------------|
| Infertility, subfertility         | 8,277          | 1                 | 4,771                   | 63              | 3,442           | 1,932          |
| Ovarian cyst                      | 22,028         | 8                 | 12,133                  | 321             | 9,566           | 4,030          |
| Uterine fibroids                  | 14,693         | 1                 | 7,798                   | 149             | 6,745           | 2,491          |
| Pelvic inflammatory disorder      | 1,740          | 0                 | 981                     | 38              | 721             | 144            |
| Pregnancy complications           | 11,008         | 2                 | 5,474                   | 148             | 5,384           | 3,371          |
| Interstitial cystitis             | 2,400          | 0                 | 1,332                   | 41              | 1,027           | 563            |
| Cystitis, urinary tract infection | 32,222         | 4                 | 16,647                  | 745             | 14,826          | 6,246          |
| Irritable bowel syndrome          | 9,290          | 0                 | 4,595                   | 218             | 4,477           | 1,799          |
| Constipation, dyschezia           | 13,875         | 1                 | 6,963                   | 381             | 6,530           | 2,443          |
| Eczema                            | 2,870          | 0                 | 1,239                   | 37              | 1,594           | 319            |
| Depression, anxiety               | 25,613         | 4                 | 13,371                  | 556             | 11,682          | 6,182          |
| Mood disorders                    | 434            | 0                 | 204                     | 18              | 212             | 70             |
| Stress                            | 878            | 0                 | 431                     | 18              | 429             | 108            |
| Fatigue, chronic fatigue syndrome | 33,447         | 6                 | 16,401                  | 863             | 16,177          | 7,523          |
| Fibromyalgia                      | 15,899         | 2                 | 7,523                   | 363             | 8,011           | 3,961          |
| Headache, migraine headache       | 28,659         | 2                 | 14,595                  | 627             | 13,435          | 6,534          |
| Ovarian cancer                    | 576            | 0                 | 293                     | 19              | 264             | 100            |
| Endometrial cancer                | 278            | 0                 | 150                     | 7               | 121             | 43             |
| Breast cancer                     | 545            | 0                 | 236                     | 15              | 294             | 142            |
| Hypothyroidism                    | 12,921         | 3                 | 6,307                   | 233             | 6,378           | 3,269          |
| SLE, RA, Sjogren's, MS            | 1,198          | 1                 | 562                     | 40              | 595             | 247            |
| Sprue                             | 833            | 0                 | 411                     | 25              | 397             | 142            |
| <b>Total</b>                      | <b>239,684</b> | <b>35</b>         | <b>122,417</b>          | <b>4,925</b>    | <b>112,307</b>  | <b>51,659</b>  |

Notes:

Abbreviations: SLE – systemic lupus erythematosus; RA – rheumatoid arthritis; MS – multiple sclerosis

Patients with multiple comorbidities appear in multiple rows

(1) Negative Cost: case patient had pre-index, index or post-index total cost < \$0

(2) Inadequate coverage: case patient does not have ≥ 365 days of continuous enrollment before and after index date

(3) No controls: case patient failed to match to any eligible control patients. Match factors were Census division, insurance product, and age

(4) Main sample: endometriosis and comorbidity presence each identified by ≥ 1 claim with a diagnosis

(5) Alt sample: endometriosis and comorbidity presence each identified by ≥ 2 claims with a diagnosis

Figure S.1. Comorbidity patient and control patient matching schematic

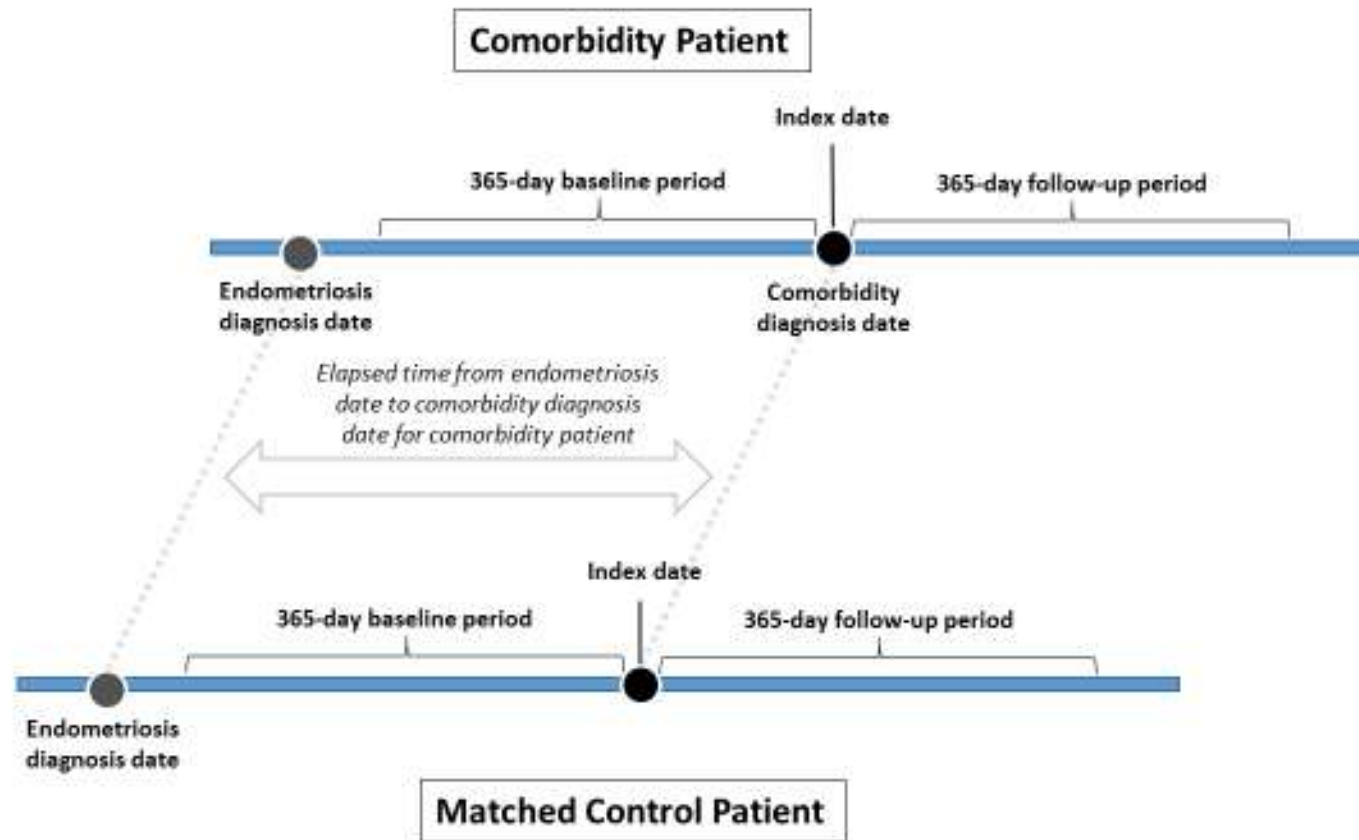

Table S.2. Difference-in-differences in 365-day total spending for comorbidity patients vs. controls

| Comorbidity                       | N      | (Before - After) Spending Difference |                           | Difference in Differences (\$) | P-value | 95% CI           |
|-----------------------------------|--------|--------------------------------------|---------------------------|--------------------------------|---------|------------------|
|                                   |        | Control Patients (\$)                | Comorbidity Patients (\$) |                                |         |                  |
| Infertility, subfertility         | 6,884  | -1,111                               | 4,630                     | 5,741                          | <0.001  | [4,985; 6,497]   |
| Ovarian cyst                      | 19,132 | -1,267                               | 3,866                     | 5,133                          | <0.001  | [4,514; 5,751]   |
| Uterine fibroids                  | 13,490 | 60                                   | 4,007                     | 3,948                          | <0.001  | [3,227; 4,668]   |
| Pelvic inflammatory disorder      | 1,442  | -4,687                               | 671                       | 5,358                          | <0.001  | [3,280; 7,435]   |
| Pregnancy complications           | 10,768 | -2,115                               | 7,728                     | 9,843                          | <0.001  | [9,162; 10,523]  |
| Interstitial cystitis             | 2,054  | -5,490                               | 1,445                     | 6,935                          | <0.001  | [5,156; 8,715]   |
| Cystitis, urinary tract infection | 29,652 | -5,295                               | -1,312                    | 3,983                          | <0.001  | [3,586; 4,379]   |
| Irritable bowel syndrome          | 8,954  | -4,162                               | -278                      | 3,884                          | <0.001  | [3,132; 4,636]   |
| Constipation, dyschezia           | 13,060 | -5,557                               | 538                       | 6,094                          | <0.001  | [5,365; 6,824]   |
| Eczema                            | 3,188  | -1,669                               | -1,626                    | 43                             | 0.94    | [-1,122; 1,207]  |
| Depression, anxiety               | 23,364 | -3,650                               | 145                       | 3,795                          | <0.001  | [3,320; 4,269]   |
| Mood disorders                    | 424    | -4,739                               | 636                       | 5,376                          | <0.001  | [2,471; 8,280]   |
| Stress                            | 858    | -3,700                               | 1,235                     | 4,935                          | <0.001  | [2,224; 7,646]   |
| Fatigue, chronic fatigue syndrome | 32,354 | -3,754                               | -385                      | 3,369                          | <0.001  | [2,936; 3,802]   |
| Fibromyalgia                      | 16,022 | -4,125                               | 271                       | 4,396                          | <0.001  | [3,826; 4,966]   |
| Headache, migraine headache       | 26,870 | -3,508                               | 373                       | 3,881                          | <0.001  | [3,467; 4,295]   |
| Ovarian cancer                    | 528    | -7,255                               | 19,881                    | 27,136                         | <0.001  | [18,477; 35,795] |
| Endometrial cancer                | 242    | -10,222                              | 4,004                     | 14,227                         | <0.001  | [7,311; 21,142]  |
| Breast cancer                     | 588    | -6,756                               | 54,453                    | 61,210                         | <0.001  | [53,763; 68,656] |
| Hypothyroidism                    | 12,756 | -2,832                               | -168                      | 2,663                          | <0.001  | [2,040; 3,287]   |
| SLE, RA, Sjogren's, MS            | 1,190  | -4,898                               | 5,073                     | 9,970                          | <0.001  | [7,190; 12,751]  |
| Sprue                             | 794    | -4,052                               | -112                      | 3,940                          | 0.003   | [1,326; 6,553]   |

Notes:

Total spending amounts are reported in 2015 USD

Abbreviations: SLE – systemic lupus erythematosus; RA – rheumatoid arthritis; MS – multiple sclerosis; CI – confidence interval

Table S.3. 365-day total spending before and after index date for comorbidity patients (alternative sample)

| Comorbidity                       | N     | Mean Spending                   |                                              | (After - Before)         |         | 95% CI           |
|-----------------------------------|-------|---------------------------------|----------------------------------------------|--------------------------|---------|------------------|
|                                   |       | 365 Days Before Index Date (\$) | Mean Spending 365 Days After Index Date (\$) | Spending Difference (\$) | P-value |                  |
| Infertility, subfertility         | 1,932 | 12,009                          | 17,398                                       | 5,389                    | <0.001  | [4,484; 6,294]   |
| Ovarian cyst                      | 4,030 | 12,036                          | 18,482                                       | 6,446                    | <0.001  | [5,730; 7,162]   |
| Uterine fibroids                  | 2,491 | 9,317                           | 17,804                                       | 8,487                    | <0.001  | [7,715; 9,258]   |
| Pelvic inflammatory disorder      | 144   | 18,848                          | 23,113                                       | 4,265                    | 0.07    | [-364; 8,894]    |
| Pregnancy complications           | 3,371 | 14,289                          | 23,378                                       | 9,088                    | <0.001  | [8,246; 9,931]   |
| Interstitial cystitis             | 563   | 19,668                          | 21,937                                       | 2,269                    | 0.09    | [-313; 4,852]    |
| Cystitis, urinary tract infection | 6,246 | 15,490                          | 15,912                                       | 422                      | 0.21    | [-243; 1,087]    |
| Irritable bowel syndrome          | 1,799 | 17,186                          | 18,243                                       | 1,057                    | 0.06    | [-38; 2,151]     |
| Constipation, dyschezia           | 2,443 | 17,818                          | 20,932                                       | 3,114                    | <0.001  | [1,969; 4,260]   |
| Eczema                            | 319   | 13,421                          | 13,311                                       | -110                     | 0.91    | [-2,049; 1,829]  |
| Depression, anxiety               | 6,182 | 14,237                          | 15,220                                       | 983                      | 0.003   | [336; 1,630]     |
| Mood disorders                    | 70    | 19,324                          | 19,938                                       | 614                      | 0.80    | [-4,071; 5,298]  |
| Stress                            | 108   | 14,129                          | 13,270                                       | -859                     | 0.57    | [-3,814; 2,096]  |
| Fatigue, chronic fatigue syndrome | 7,523 | 14,007                          | 13,541                                       | -466                     | 0.09    | [-1,002; 70]     |
| Fibromyalgia                      | 3,961 | 16,024                          | 16,867                                       | 843                      | 0.026   | [103; 1,582]     |
| Headache, migraine headache       | 6,534 | 13,605                          | 15,032                                       | 1,427                    | <0.001  | [861; 1,993]     |
| Ovarian cancer                    | 100   | 19,664                          | 55,072                                       | 35,407                   | <0.001  | [22,454; 48,360] |
| Endometrial cancer                | 43    | 21,289                          | 38,281                                       | 16,993                   | 0.024   | [2,233; 31,753]  |
| Breast cancer                     | 142   | 17,731                          | 83,486                                       | 65,754                   | <0.001  | [53,621; 77,888] |
| Hypothyroidism                    | 3,269 | 14,620                          | 14,707                                       | 86                       | 0.81    | [-617; 790]      |
| SLE, RA, Sjogren's, MS            | 247   | 19,198                          | 28,869                                       | 9,671                    | <0.001  | [5,734; 13,608]  |
| Sprue                             | 142   | 16,239                          | 16,912                                       | 673                      | 0.73    | [-3,107; 4,453]  |

Notes:

Selection criteria require  $\geq 2$  claims for a comorbidity

Total spending amounts are reported in 2015 USD

Abbreviations: SLE – systemic lupus erythematosus; RA – rheumatoid arthritis; MS – multiple sclerosis CI – confidence interval

Index date defined as date of earliest claim with comorbidity diagnosis code

Table S.4. Difference-in-differences in 365-day total spending for comorbidity patients vs. controls (alternative sample)

| Comorbidity                       | N      | (Before - After) Spending Difference |                           | Difference in Differences (\$) | P-value | 95% CI           |
|-----------------------------------|--------|--------------------------------------|---------------------------|--------------------------------|---------|------------------|
|                                   |        | Control Patients (\$)                | Comorbidity Patients (\$) |                                |         |                  |
| Infertility, subfertility         | 3,864  | -1,484                               | 5,389                     | 6,872                          | <0.001  | [5,888; 7,857]   |
| Ovarian cyst                      | 8,060  | -2,302                               | 6,446                     | 8,748                          | <0.001  | [7,963; 9,533]   |
| Uterine fibroids                  | 4,982  | 167                                  | 8,487                     | 8,319                          | <0.001  | [7,477; 9,162]   |
| Pelvic inflammatory disorder      | 288    | -7,156                               | 4,265                     | 11,421                         | <0.001  | [6,365; 16,477]  |
| Pregnancy complications           | 6,742  | -2,732                               | 9,088                     | 11,820                         | <0.001  | [10,865; 12,775] |
| Interstitial cystitis             | 1,126  | -6,850                               | 2,269                     | 9,119                          | <0.001  | [6,424; 11,815]  |
| Cystitis, urinary tract infection | 12,492 | -6,090                               | 422                       | 6,512                          | <0.001  | [5,791; 7,233]   |
| Irritable bowel syndrome          | 3,598  | -4,565                               | 1,057                     | 5,622                          | <0.001  | [4,249; 6,995]   |
| Constipation, dyschezia           | 4,886  | -6,528                               | 3,114                     | 9,642                          | <0.001  | [8,331; 10,953]  |
| Eczema                            | 638    | -2,953                               | -110                      | 2,843                          | 0.005   | [866; 4,820]     |
| Depression, anxiety               | 12,364 | -4,417                               | 983                       | 5,400                          | <0.001  | [4,697; 6,104]   |
| Mood disorders                    | 140    | -4,401                               | 614                       | 5,015                          | 0.11    | [-1,173; 11,202] |
| Stress                            | 216    | -3,805                               | -859                      | 2,946                          | 0.08    | [-371; 6,262]    |
| Fatigue, chronic fatigue syndrome | 15,046 | -4,928                               | -466                      | 4,462                          | <0.001  | [3,858; 5,066]   |
| Fibromyalgia                      | 7,922  | -5,134                               | 843                       | 5,976                          | <0.001  | [5,114; 6,838]   |
| Headache, migraine headache       | 13,068 | -4,333                               | 1,427                     | 5,760                          | <0.001  | [5,122; 6,399]   |
| Ovarian cancer                    | 200    | -7,775                               | 35,407                    | 43,182                         | <0.001  | [29,615; 56,750] |
| Endometrial cancer                | 86     | -5,854                               | 16,993                    | 22,847                         | 0.004   | [7,160; 38,533]  |
| Breast cancer                     | 284    | -7,339                               | 65,754                    | 73,093                         | <0.001  | [61,150; 85,036] |
| Hypothyroidism                    | 6,538  | -3,465                               | 86                        | 3,551                          | <0.001  | [2,640; 4,462]   |
| SLE, RA, Sjogren's, MS            | 494    | -5,588                               | 9,671                     | 15,259                         | <0.001  | [10,906; 19,613] |
| Sprue                             | 284    | -6,190                               | 673                       | 6,863                          | 0.005   | [2,117; 11,609]  |

Notes:

Selection criteria require  $\geq 2$  claims for a comorbidity

Total spending amounts are reported in 2015 USD

Abbreviations: SLE – systemic lupus erythematosus; RA – rheumatoid arthritis; MS – multiple sclerosis; CI – confidence interval
